# Supplementary material for: Presence of anaplastic lymphoma kinase in inflammatory breast cancer
Source: PubMed Central journal article supplement (PMC3791224; doi:10.1186/2193-1801-2-497), 2013-10-01
Supplement: 40064_2013_554_MOESM1_ESM.pdf [file 40064_2013_554_MOESM1_ESM.pdf]

## Supplemental Table 1. Chromosomal Microarray Analysis of Pre-Clinical Models of IBC

| Gene and Location          | Gene description                                                      | Copy number     |          |        |         |                  |         |       |         |                 |         |
|----------------------------|-----------------------------------------------------------------------|-----------------|----------|--------|---------|------------------|---------|-------|---------|-----------------|---------|
|                            |                                                                       | IBC             |          |        |         |                  |         |       | Non-IBC |                 |         |
|                            |                                                                       | Triple negative |          |        |         | ER(-)PR(-)ErbB2+ |         |       | ER(+)   | Triple negative |         |
|                            |                                                                       | FC-IBC01        | FC-IBC02 | Mary-X | SUM-149 | MDA-IBC3         | SUM-190 | KPL4  | MCF7    | MDA-MB-231      | SUM-159 |
| <b>ALK</b><br>2p23.2       | <b>Anaplastic lymphoma kinase, receptor tyrosine kinase, oncogene</b> | UPD             | 3.5-4    | 3      | 1.5     | 3                | 1       | 3     | 2       | mos UPD         | 2       |
| <b>EGFR</b><br>7p12        | <b>Epidermal Growth Factor Receptor</b>                               | mos UPD         | 2.5-3    | 2.5    | 2.5-3   | 1                | 4       | 3     | UPD     | mos UPD         | UPD     |
| <b>PTK2/FAK1</b><br>8q24.3 | <b>Focal adhesion kinase 1</b>                                        | 4               | 6 HMZ    | 6 HMZ  | 2.5     | 2.5              | 2.5     | 4 hmz | 2.5     | 2.5 hmz         | 2       |
| <b>CD44</b><br>11p13       | <b>CD44</b>                                                           | 10 HMZ          | 8        | UPD    | 3       | 1                | 1       | 2     | 1       | 2               | 2       |

Table 1. Copy number of some amplified genes in IBC and non IBC cells. Abbreviations: Hmz, homozygous; UPD, uniparental disomy (two copies with LOH); mos: mosaic.
