# Supplementary material for: Presence of anaplastic lymphoma kinase in inflammatory breast cancer
Source: PubMed Central journal article supplement (PMC3791224; doi:10.1186/2193-1801-2-497), 2013-10-01

# Supplemental Figure 1

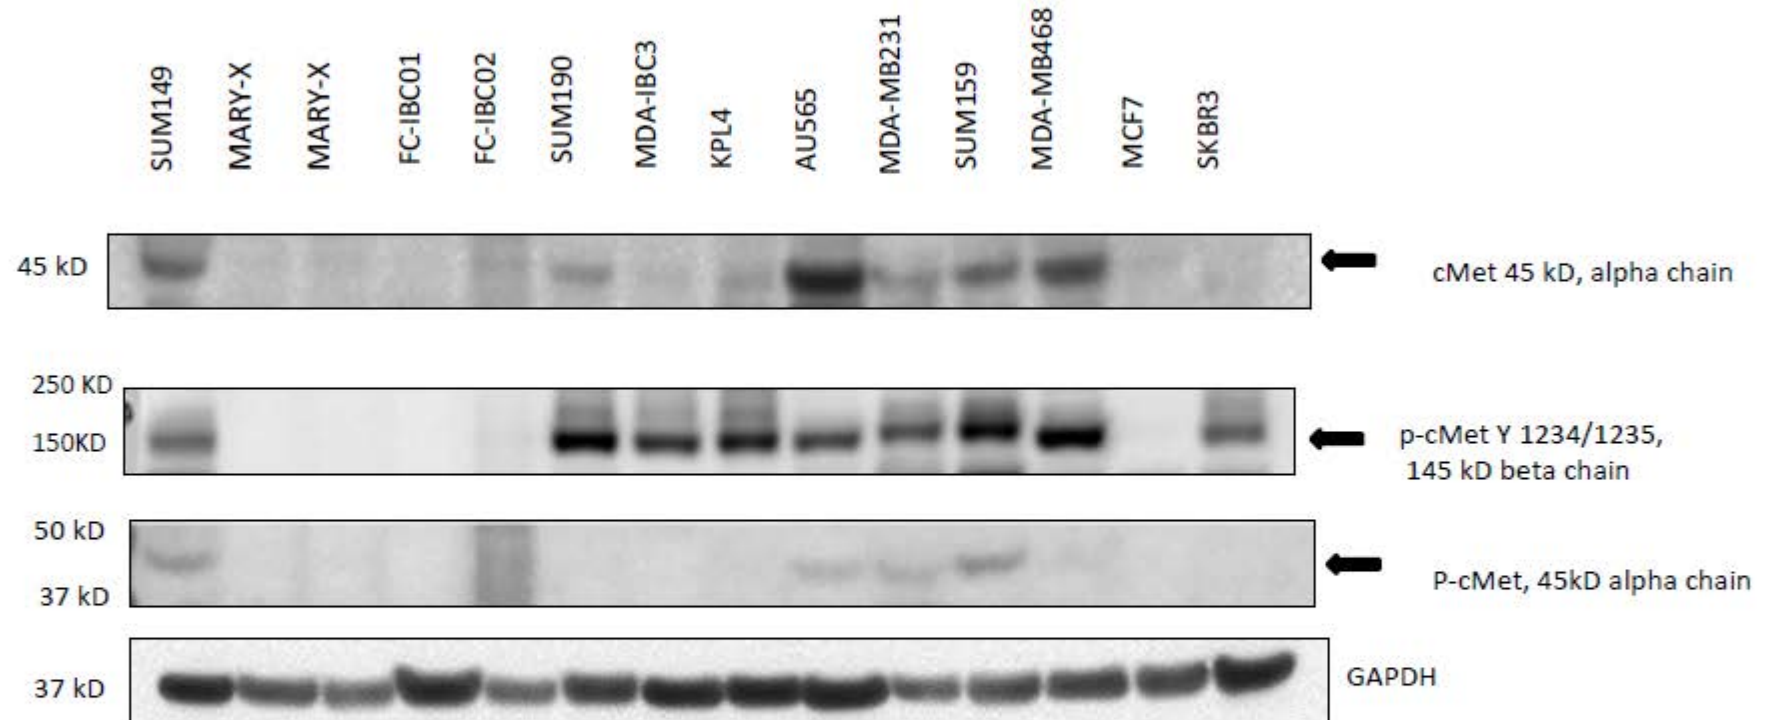

Supplement: 40064_2013_554_MOESM2_ESM.pdf [file 40064_2013_554_MOESM2_ESM.pdf]
